# Supplementary material for: Association of Serum Choline and Its Metabolites with Infant’s Growth and Neurodevelopment from Birth to 12 Months
Source: Research Square preprint supplement (doi:10.21203/rs.3.rs-7058350/v1), 2025-07-23
Supplement: Supplementary file 1 [file a3018dd33295be8a77cceeb6.docx]

**Association of serum choline and its metabolites with infant’s growth and neurodevelopment from birth to 12 months**

**Table S1** Comparison of the statistical goodness of fit for growth curve model.

| **Model** | **AIC** | **AICc** | **BIC** |
| --- | --- | --- | --- |
| **Length** |  |  |  |
| Linear | 2569.377 | 2569.430 | 2581.738 |
| Quadratic | 2387.538 | 2387.627 | 2404.020 |
| Cubic | 2360.792 | 2360.926 | 2381.394 |
| **Weight** |  |  |  |
| Linear | 1587.646 | 1587.699 | 1600.020 |
| Quadratic | 1544.192 | 1544.281 | 1560.691 |
| Cubic | 1519.162 | 1519.295 | 1539.786 |
| **Head circumference** | |  |  |
| Linear | 1382.297 | 1382.371 | 1393.704 |
| Quadratic | 1233.965 | 1234.088 | 1249.174 |
| Cubic | 1176.334 | 1176.519 | 1195.345 |

AIC: Akaike information criterion; AICc: corrected Akaike information criterion; BIC: Bayesian information criterion.

**Table S2** The fixed-effect estimation of a linear mixed-effects model was used to predict the longitudinal changes in serum choline levels and anthropometric parameters among infants aged 0 to 12 months.

| **Fixed Effect** | **β** | **SE** | **95%CI** | ***P*-Value** |
| --- | --- | --- | --- | --- |
| **Length and Choline** |  |  |  |  |
| Intercept | 0.082 | 0.026 | 0.031, 0.133 | 0.003 |
| Poly(age,3)1 | 19.259 | 0.316 | 18.646, 19.891 | <0.001 |
| Poly(age,3)2 | -3.901 | 0.168 | -4.232, -3.573 | <0.001 |
| Poly(age,3)3 | 2.252 | 0.166 | 1.925, 2.580 | <0.001 |
| ln choline | 0.024 | 0.018 | -0.010, 0.058 | 0.188 |
| Birth weight | 0.106 | 0.021 | 0.065, 0.147 | <0.001 |
| Age at blood collection | 0.018 | 0.017 | -0.015, 0.051 | 0.292 |
| Gestational age | 0.013 | 0.020 | -0.026, 0.053 | 0.515 |
| Gender | -0.192 | 0.035 | -0.261, -0.124 | <0.001 |
| **Weight and Choline** |  |  |  |  |
| Intercept | 0.097 | 0.042 | 0.017, 0.177 | 0.022 |
| Poly(age,3)1 | 17.460 | 0.566 | 16.340, 18.577 | <0.001 |
| Poly(age,3)2 | -2.299 | 0.251 | -2.809, -1.812 | <0.001 |
| Poly(age,3)3 | 4.143 | 0.246 | 3.660, 4.630 | <0.001 |
| ln choline | 0.020 | 0.026 | -0.030, 0.071 | 0.446 |
| Birth weight | 0.138 | 0.032 | 0.077, 0.199 | <0.001 |
| Age at blood collection | 0.014 | 0.026 | -0.036, 0.063 | 0.598 |
| Gestational age | 0.0004 | 0.030 | -0.057, 0.058 | 0.990 |
| Gender | -0.252 | 0.053 | -0.353, -0.152 | <0.001 |
| **Head circumference and Choline** |  |  |  |  |
| Intercept | 0.181 | 0.053 | 0.081, 0.282 | <0.001 |
| Poly(age,3)1 | 14.163 | 0.400 | 13.339, 14.964 | <0.001 |
| Poly(age,3)2 | -6.891 | 0.279 | -7.437, -6.337 | <0.001 |
| Poly(age,3)3 | 4.007 | 0.238 | 3.539, 4.472 | <0.001 |
| ln choline | 0.062 | 0.038 | -0.010, 0.134 | 0.101 |
| Birth weight | 0.126 | 0.044 | 0.041, 0.212 | 0.006 |
| Age at blood collection | 0.050 | 0.037 | -0.020, 0.120 | 0.176 |
| Gestational age | 0.043 | 0.044 | -0.045, 0.131 | 0.339 |
| Gender | -0.306 | 0.076 | -0.452, -0.160 | <0.001 |

**Table S3** The fixed-effect estimation of a linear mixed-effects model was used to predict the longitudinal changes in serum betaine levels and anthropometric parameters among infants aged 0 to 12 months.

| **Fixed Effect** | **β** | **SE** | **95%CI** | ***P*-Value** |
| --- | --- | --- | --- | --- |
| **Length and Betaine** |  |  |  |  |
| Intercept | 0.084 | 0.027 | 0.033, 0.135 | 0.002 |
| Poly(age,3)1 | 19.264 | 0.316 | 18.651, 19.898 | <0.001 |
| Poly(age,3)2 | -3.892 | 0.168 | -4.223, -3.564 | <0.001 |
| Poly(age,3)3 | 2.267 | 0.166 | 1.942, 2.597 | <0.001 |
| ln betaine | 0.023 | 0.018 | -0.012, 0.058 | 0.219 |
| Birth weight | 0.106 | 0.022 | 0.064, 0.147 | <0.001 |
| Age at blood collection | 0.016 | 0.017 | -0.017, 0.049 | 0.348 |
| Gestational age | 0.011 | 0.021 | -0.029, 0.051 | 0.598 |
| Gender | -0.201 | 0.036 | -0.27, -0.133 | <0.001 |
| **Weight and Betaine** |  |  |  |  |
| Intercept | 0.099 | 0.041 | 0.020, 0.178 | 0.019 |
| Poly(age,3)1 | 17.461 | 0.566 | 16.345, 18.581 | <0.001 |
| Poly(age,3)2 | -2.293 | 0.251 | -2.801, -1.806 | <0.001 |
| Poly(age,3)3 | 4.159 | 0.245 | 3.678, 4.647 | <0.001 |
| ln betaine | 0.035 | 0.027 | -0.017, 0.086 | 0.201 |
| Birth weight | 0.141 | 0.032 | 0.079, 0.201 | <0.001 |
| Age at blood collection | 0.013 | 0.025 | -0.035, 0.061 | 0.595 |
| Gestational age | -0.006 | 0.031 | -0.064, 0.053 | 0.846 |
| Gender | -0.264 | 0.053 | -0.365, -0.163 | <0.001 |
| **Head circumference and Betaine** |  |  |  |  |
| Intercept | 0.183 | 0.054 | 0.080, 0.285 | <0.001 |
| Poly(age,3)1 | 14.170 | 0.401 | 13.355, 14.968 | <0.001 |
| Poly(age,3)2 | -6.892 | 0.279 | -7.438, -6.338 | <0.001 |
| Poly(age,3)3 | 4.009 | 0.238 | 3.542, 4.474 | <0.001 |
| ln betaine | 0.031 | 0.039 | -0.045, 0.107 | 0.432 |
| Birth weight | 0.122 | 0.045 | 0.036, 0.209 | 0.008 |
| Age at blood collection | 0.042 | 0.037 | -0.028, 0.112 | 0.254 |
| Gestational age | 0.043 | 0.046 | -0.047, 0.133 | 0.353 |
| Gender | -0.325 | 0.079 | -0.475, -0.175 | <0.001 |

**Table S4** The fixed-effect estimation of a linear mixed-effects model was used to predict the longitudinal changes in serum TMAO levels and anthropometric parameters among infants aged 0 to 12 months.

| **Fixed Effect** | **β** | **SE** | **95%CI** | ***P*-Value** |
| --- | --- | --- | --- | --- |
| **Length and TMAO** |  |  |  |  |
| Intercept | 0.079 | 0.030 | 0.022, 0.138 | 0.011 |
| Poly(age,3)1 | 16.499 | 0.296 | 15.919, 17.09 | <0.001 |
| Poly(age,3)2 | -3.446 | 0.148 | -3.736, -3.158 | <0.001 |
| Poly(age,3)3 | 1.619 | 0.138 | 1.352, 1.894 | <0.001 |
| ln TMAO | -0.022 | 0.022 | -0.065, 0.019 | 0.314 |
| Birth weight | 0.106 | 0.027 | 0.055, 0.158 | <0.001 |
| Age at blood collection | 0.014 | 0.021 | -0.025, 0.054 | 0.494 |
| Gestational age | 0.017 | 0.025 | -0.030, 0.066 | 0.490 |
| Gender | -0.217 | 0.042 | -0.300, -0.136 | <0.001 |
| **Weight and TMAO** |  |  |  |  |
| Intercept | 0.090 | 0.046 | 0.001, 0.179 | 0.056 |
| Poly(age,3)1 | 14.790 | 0.54 | 13.712, 15.861 | <0.001 |
| Poly(age,3)2 | -2.290 | 0.213 | -2.717, -1.879 | <0.001 |
| Poly(age,3)3 | 2.987 | 0.193 | 2.611, 3.367 | <0.001 |
| ln TMAO | -0.021 | 0.033 | -0.084, 0.041 | 0.518 |
| Birth weight | 0.143 | 0.04 | 0.067, 0.218 | <0.001 |
| Age at blood collection | 0.015 | 0.031 | -0.044, 0.074 | 0.633 |
| Gestational age | -0.001 | 0.037 | -0.070, 0.069 | 0.988 |
| Gender | -0.273 | 0.062 | -0.392, -0.155 | <0.001 |
| **Head circumference and TMAO** |  |  |  |  |
| Intercept | 0.155 | 0.061 | 0.040, 0.270 | 0.014 |
| Poly(age,3)1 | 12.106 | 0.388 | 11.345, 12.882 | <0.001 |
| Poly(age,3)2 | -5.952 | 0.263 | -6.464, -5.431 | <0.001 |
| Poly(age,3)3 | 3.251 | 0.217 | 2.826, 3.673 | <0.001 |
| ln TMAO | 0.037 | 0.047 | -0.053, 0.127 | 0.441 |
| Birth weight | 0.137 | 0.056 | 0.030, 0.244 | 0.018 |
| Age at blood collection | 0.049 | 0.045 | -0.036, 0.135 | 0.275 |
| Gestational age | 0.024 | 0.055 | -0.081, 0.131 | 0.663 |
| Gender | -0.354 | 0.092 | -0.527, -0.181 | <0.001 |
